# Supplementary material
Source: PubMed Central journal article supplement (PMC2675952)

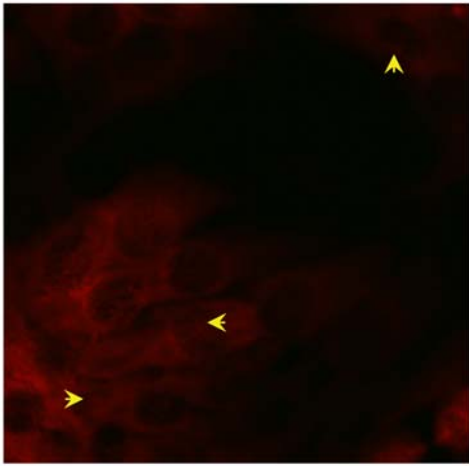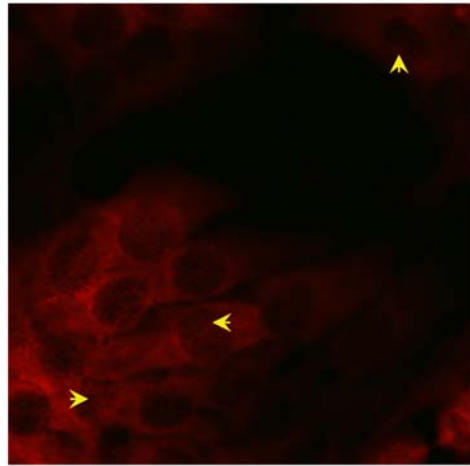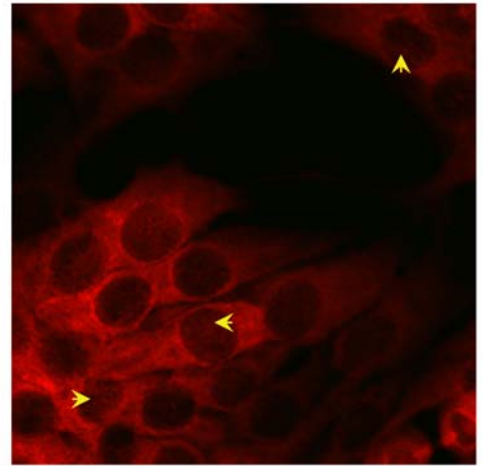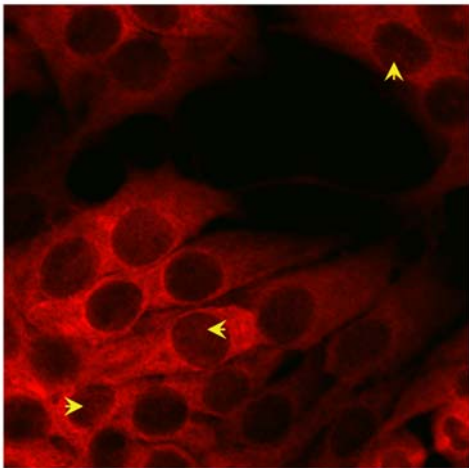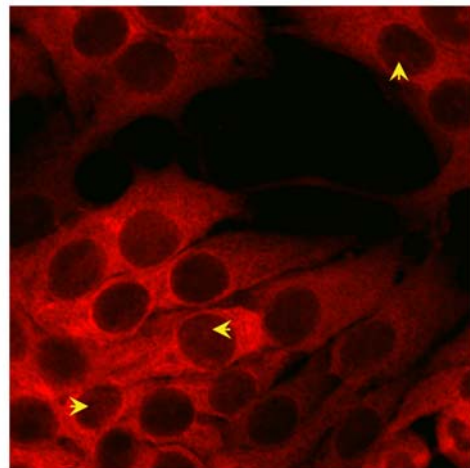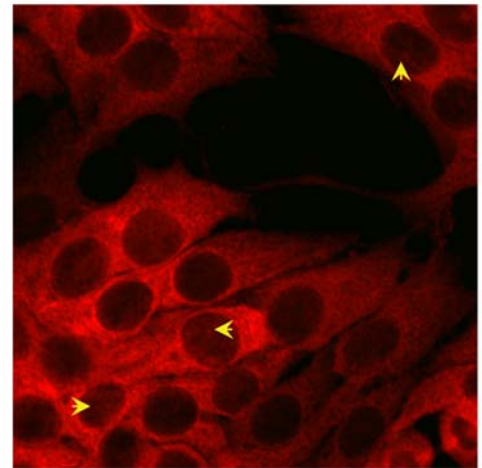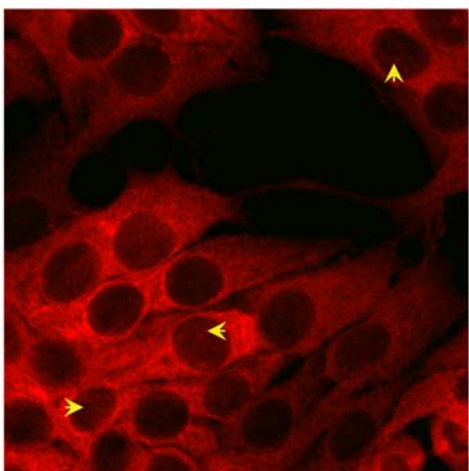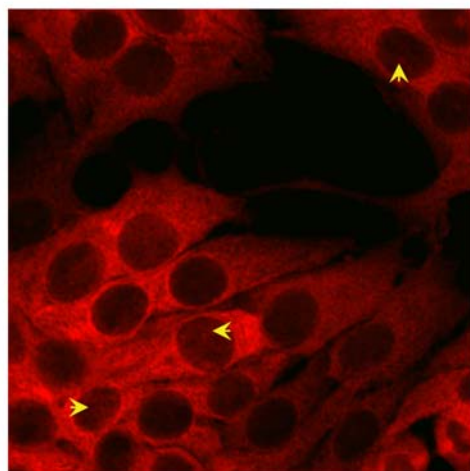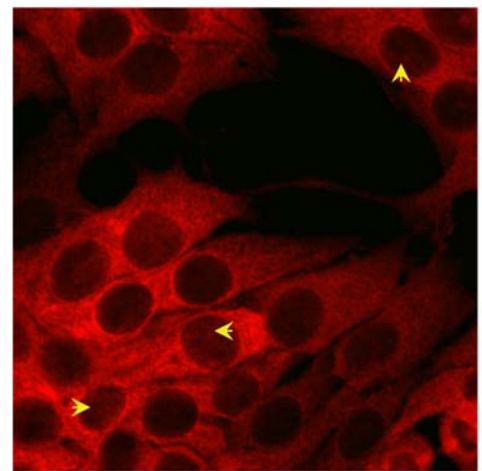

**Supplemental Figure 1**

Supplement: me.2007-0477_1.pdf [file me.2007-0477_1.pdf]

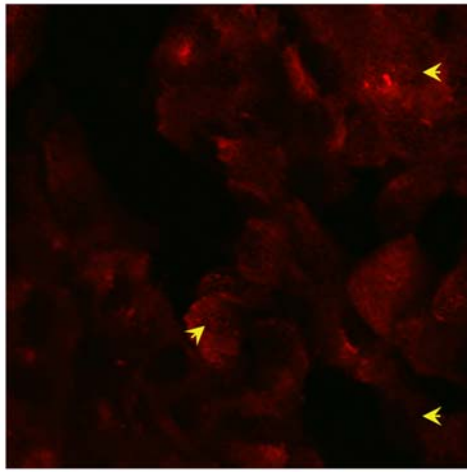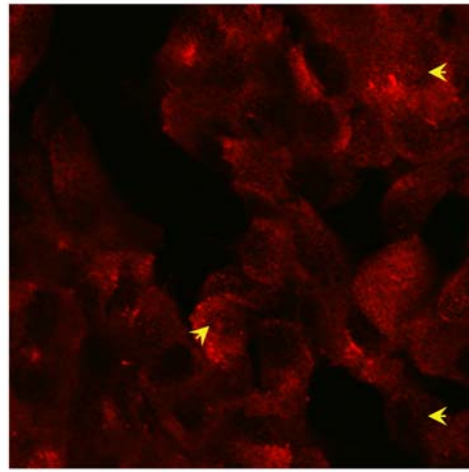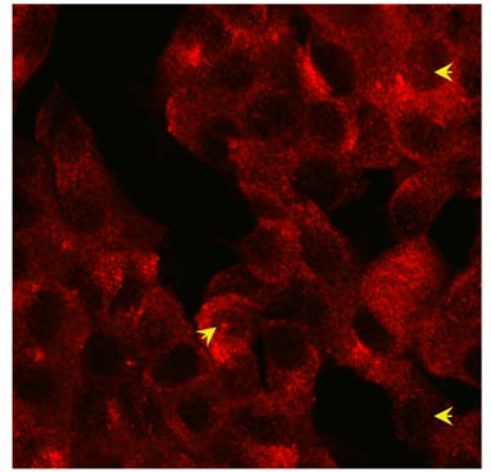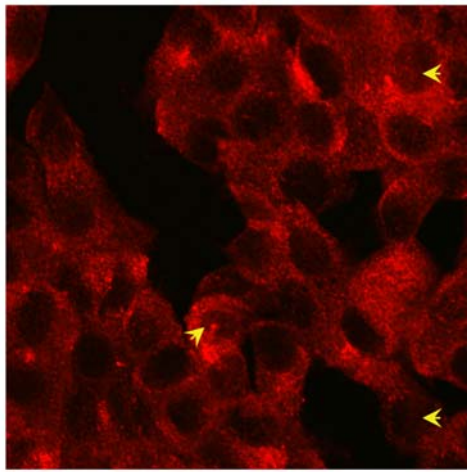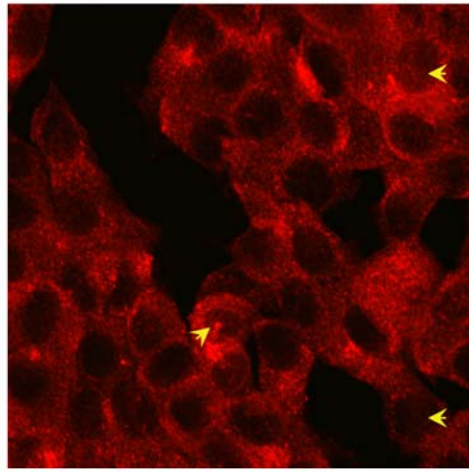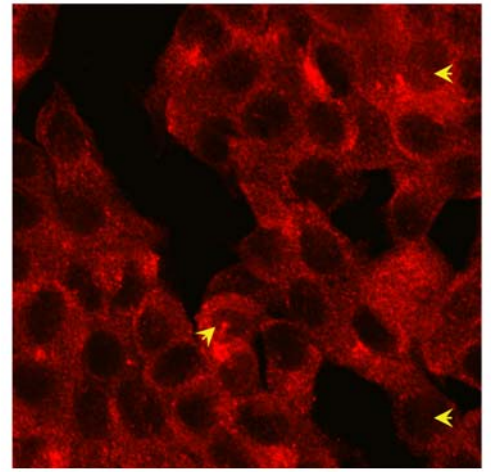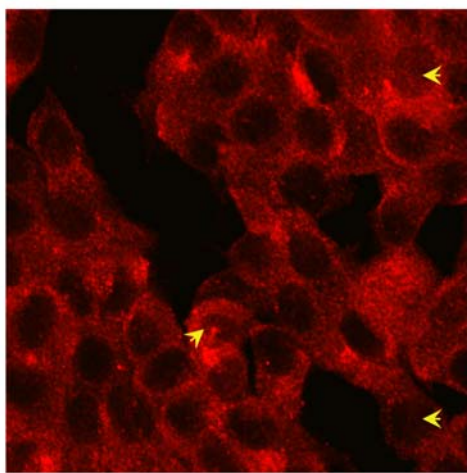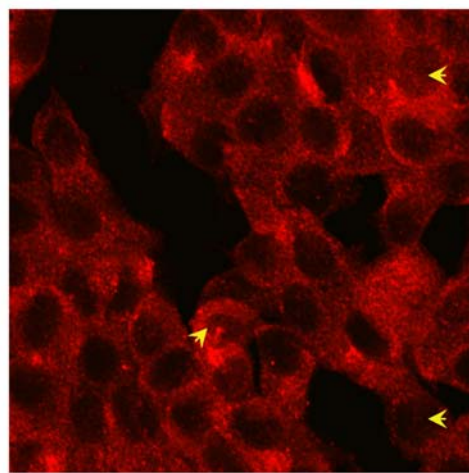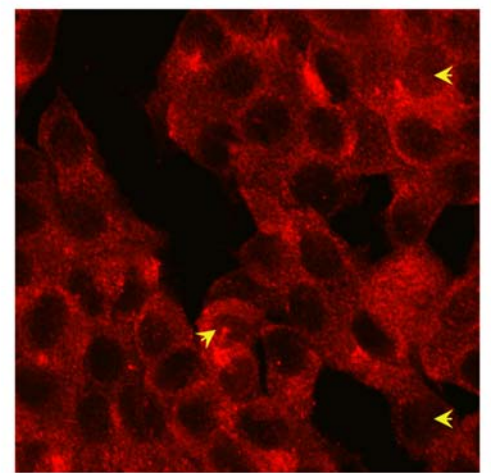

Supplemental Figure 2

Supplement: me.2007-0477_2.pdf [file me.2007-0477_2.pdf]

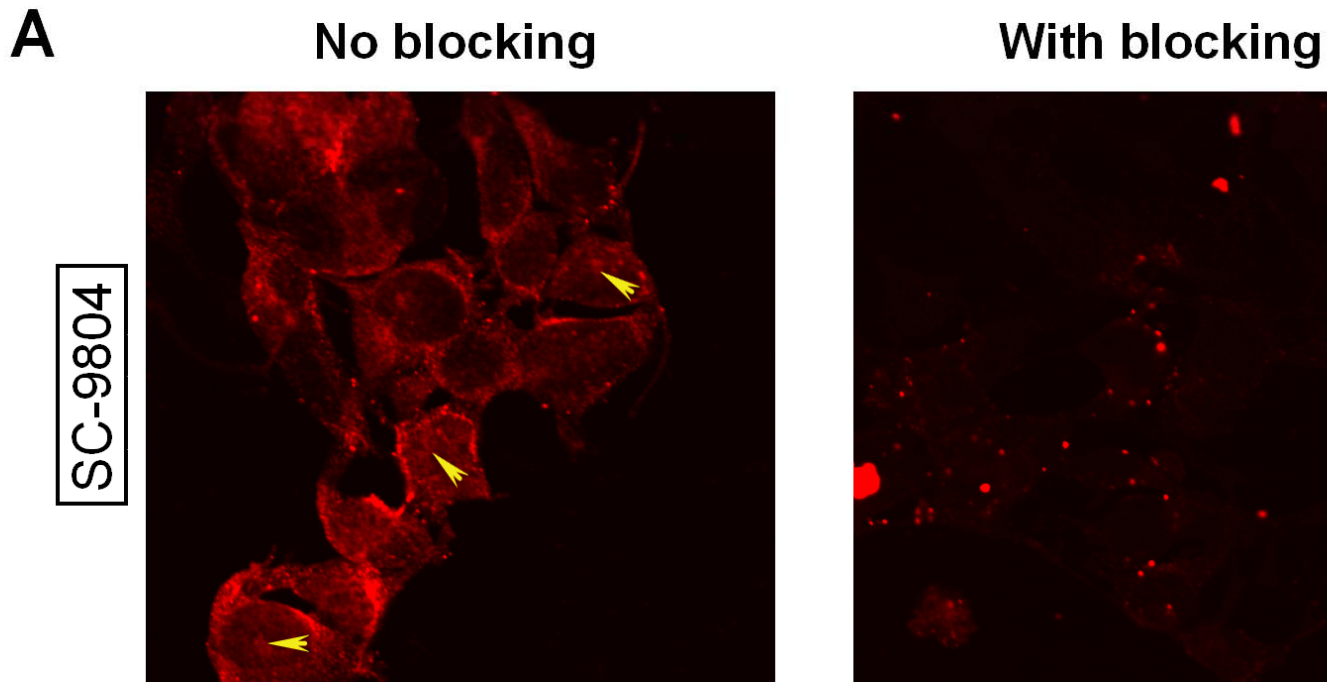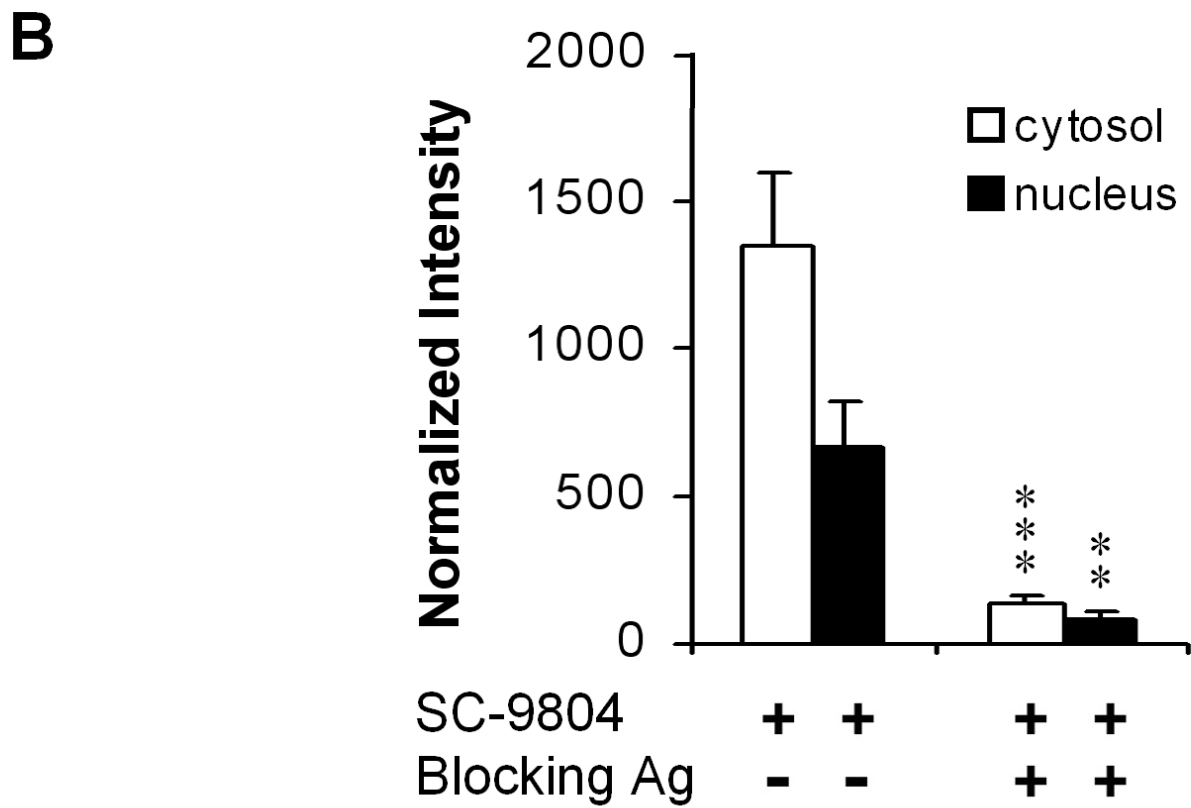

**Supplemental Figure 3**

Supplement: me.2007-0477_3.pdf [file me.2007-0477_3.pdf]

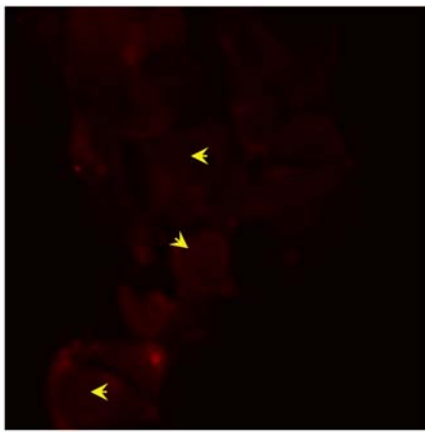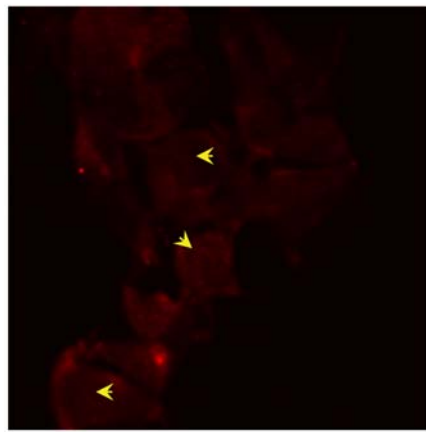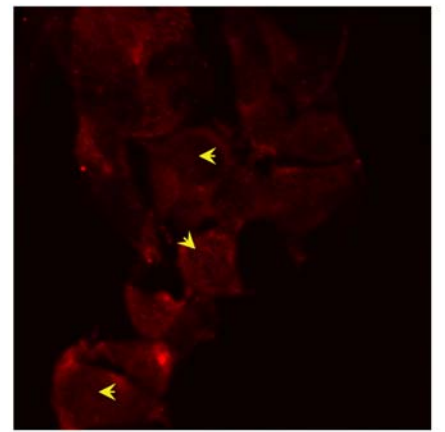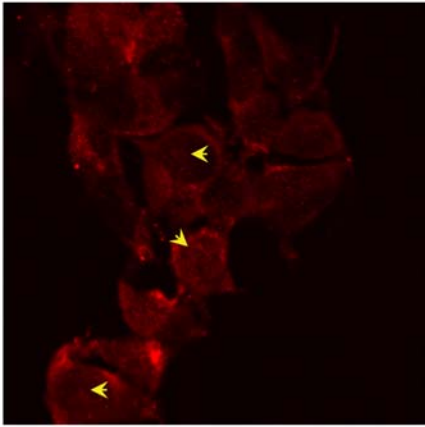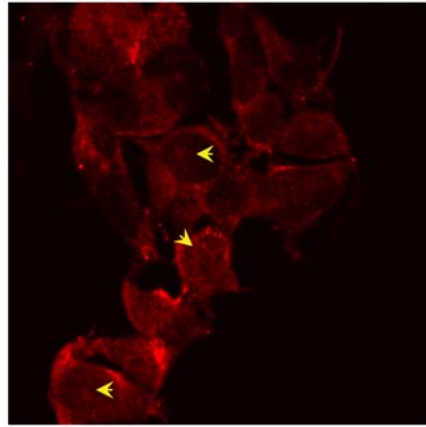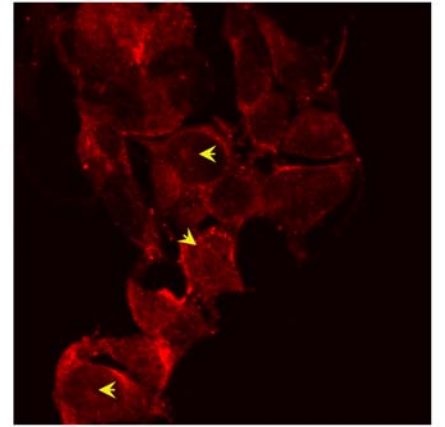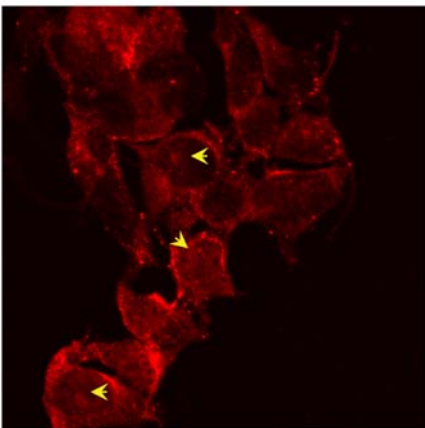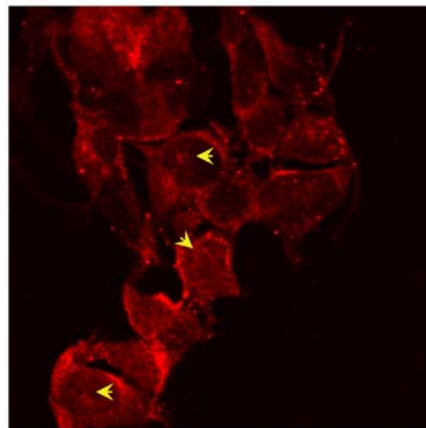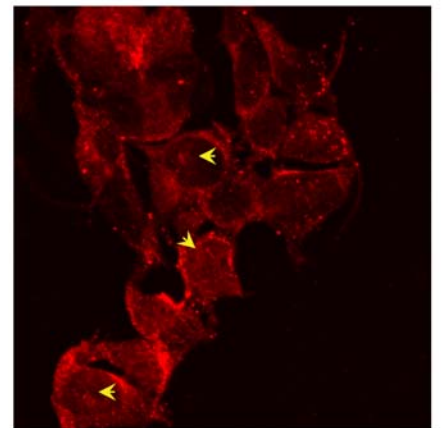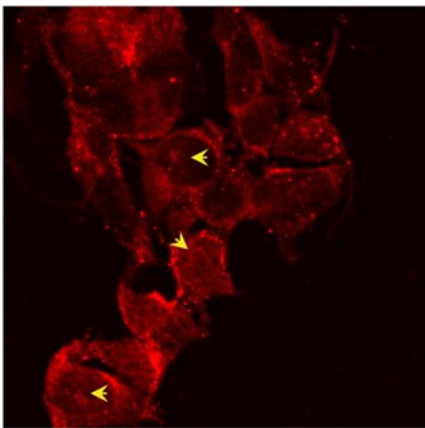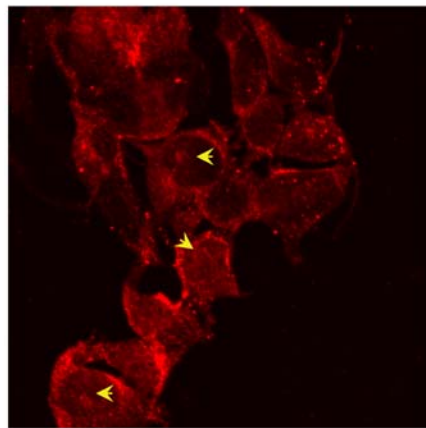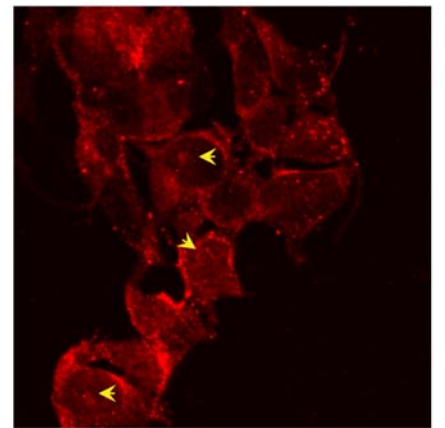

Supplemental Figure 4

Supplement: me.2007-0477_4.pdf [file me.2007-0477_4.pdf]
